# Supplementary material
Source: Elsevier journal article supplement (https://publikationen.ub.uni-frankfurt.de/files/43019/mmc1.docx)
Supplement: mmc1 [file mmc1.docx]

|  | Adaptation technique γ -fail rates (mean ± 1 SD) (%) | | | | | |
| --- | --- | --- | --- | --- | --- | --- |
|  | **3%/3mm** | | **2%/2mm** | | **1%/1mm** | |
|  | **No motion correction** | **With adaptation** | **No motion correction** | **With adaptation** | **No motion correction** | **With adaptation** |
| **Lung** |  |  |  |  |  |  |
| **Typical** | 0.6 (±1.0) | 0.2 (±0.3) | 2.3 (±2.3) | 0.4 (±0.6)* | 21.5 (±14.4) | 6.9 (±10.6)* |
| **Pred. left-right** | 4.0 (±7.3) | 1.0 (±1.9) | 11.0 (±14.9) | 2.5 (±2.7)* | 36.6 (±19.8) | 10.3 (±13.0)* |
| **High-frequency** | 19.0 (±14.4) | 0.1 (±0.2)* | 34.4 (±15.8) | 2.6 (±3.6)* | 55.9 (±8.4) | 9.5 (±14.7)* |
| **Baseline shifts** | 3.1 (±4.7) | 0.5 (±0.7) | 9.5 (±7.3) | 1.4 (±2.1)* | 36.8 (±14.9) | 10.1 (±13.7)* |
| **Sinusoidal** | 3.7 (±3.9) | 0.4 (±1.0)* | 12.1 (±6.1) | 0.7 (±1.3)* | 37.3 (±15.2) | 5.5 (±7.0)* |
| **Prostate** |  |  |  |  |  |  |
| **Stable** | 5.9 (±3.6) | 0.1 (±0.2) | 5.9 (±8.8) | 0.5 (±0.7) | 16.8 (±20.2) | 4.3 (±4.7) |
| **Continuous drift** | 8.5 (±6.0) | 0.8 (±1.8)* | 19.0 (±11.2) | 2.5 (±3.2)* | 48.9 (±12.3) | 11.1 (±10.4)* |
| **High-frequency** | 7.7 (±7.8) | 0.1 (±0.1)* | 21.3 (±14.7) | 1.8 (±1.1)* | 50.1 (±12.6) | 12.1 (±6.9)* |
| **Erratic** | 1.7 (±4.4) | 0.6 (±1.1)* | 17.5 (±8.6) | 3.7 (±3.8)* | 45.6 (±18.5) | 13.1 (±10.0)* |

Supplemental table 1. Mean (mean ± 1 SD) percentage of points that failed the 3%/3mm, 2%2mm and 1%1mm γ -tests with and without adaptation for each of the motion traces (all adaptation type results combined). * indicate Wilcoxon sign rank p-values < 0.05 for the adaptation to no motion correction pairs
